# Supplementary material for: Molecular targets and mechanisms of Sijunzi decoction in the treatment of Parkinson’s disease: evidence from network pharmacology, molecular docking, molecular dynamics simulation, and experimental validation
Source: Front Pharmacol. 2024 Nov 26;15:1487474. doi: 10.3389/fphar.2024.1487474 (PMC11629541; doi:10.3389/fphar.2024.1487474)
Supplement: Supplementary file 3 [file Table1.XLSX]

## Sheet: Sheet1
Supplementary Table 1. Information of 213 pathways based on KEGG enrichment analysis.
ID	Description	Gene Ratio	Bg Ratio	p value	p adjust	q value	Gene ID	Count
hsa05418	Fluid shear stress and atherosclerosis	43/407	139/8584	3.42524e-24	1.05155e-21	3.28102e-22	PDGFB/SRC/IFNG/MMP9/TNF/BCL2/EDN1/IL1B/NFKB1/FOS/CHUK/IKBKB/TP53/AKT1/CAV3/CYBA/NCF2/RAC1/RAC2/GSTA4/GSTM1/GSTM2/GSTM3/GSTO1/GSTO2/GSTP1/GSTT1/MGST1/MGST3/NOX1/ICAM1/VCAM1/NQO1/CAV1/MAPK14/CTNNB1/AKT2/AKT3/CCL2/RHOA/HSP90AA1/HMOX1/NOS3	43
hsa05417	Lipid and atherosclerosis	49/407	215/8584	5.60025e-21	8.59638e-19	2.68223e-19	SRC/MMP9/TNF/BCL2/FAS/IL1B/BAX/NFKB1/FOS/CD40/CHUK/IKBKB/IL6/MYD88/PPARG/TP53/AKT1/PRKCA/CD36/CYBA/CYBB/NCF2/RAC1/TLR4/NOX1/ICAM1/VCAM1/ABCA1/HSPA5/MAPK14/NFKBIA/APAF1/CASP9/VLDLR/XBP1/AKT2/AKT3/APOA1/CCL2/CCL5/DDIT3/FASLG/IRAK1/RHOA/CYP1A1/HSPD1/HSP90AA1/CDC42/NOS3	49
hsa05207	Chemical carcinogenesis - receptor activation	47/407	212/8584	1.27287e-19	1.30257e-17	4.06425e-18	MAP2K1/ESR1/ESR2/SRC/VDR/AR/BCL2/CACNA1D/CYP3A4/NFKB1/ADCY5/ADRB2/CACNA1C/CHRNA7/FOS/FGF10/CACNA1A/CACNA1F/AKT1/PRKCA/EGFR/KLF4/NOTCH2/CHRNA3/CHRNA4/CHRNB4/GSTA4/GSTM1/GSTM2/GSTM3/GSTO1/GSTO2/GSTT1/MGST1/MGST3/FGF2/PPARA/CREB1/JAG1/AKT2/AKT3/GNAS/CYP1A1/MYC/HSP90AA1/CYP1A2/PRKACA	47
hsa04024	cAMP signaling pathway	48/407	225/8584	2.80006e-19	2.14905e-17	6.70541e-18	ATP1A1/MAP2K1/SOX9/ADORA1/CACNA1D/EDN1/GRIN2A/NPPA/NFKB1/ADCY5/ADRB2/ATP1A3/CACNA1C/CRH/CRHR1/DRD1/DRD2/DRD5/FOS/GHRL/GRIN1/HTR1A/PPP1R1B/CACNA1F/CFTR/AKT1/GRIN2B/ADORA2A/PDE4A/RAC1/RAC2/HCN4/ATP1A2/GLI3/GRIA1/GRIA2/GCG/NFKBIA/PPARA/ATP2A1/CREB1/AKT2/AKT3/GNAS/RHOA/RYR2/PDE10A/PRKACA	48
hsa04933	AGE-RAGE signaling pathway in diabetic complications	30/407	100/8584	9.18848e-17	5.64172e-15	1.76032e-15	TGFB1/TNF/BCL2/EDN1/IL1B/BAX/NFKB1/IL6/AKT1/PRKCA/AGTR1/CYBB/RAC1/PRKCD/NOX1/TGFB2/ICAM1/VCAM1/MAPK14/AGT/SMAD3/TGFBR2/AKT2/AKT3/CCL2/SMAD4/COL1A1/SERPINE1/CDC42/NOS3	30
hsa05142	Chagas disease	30/407	102/8584	1.69647e-16	8.68027e-15	2.7084e-15	TGFB1/IFNG/TNF/FAS/IL1B/NFKB1/FOS/CHUK/IKBKB/IL2/IL6/MYD88/NOS2/AKT1/C3/TLR4/TGFB2/MAPK14/NFKBIA/TGFBR2/AKT2/AKT3/CCL2/CCL5/FASLG/GNAS/IRAK1/ACE/SERPINE1/IL10	30
hsa04932	Non-alcoholic fatty liver disease	36/407	155/8584	6.23572e-16	2.73481e-14	8.53309e-15	TGFB1/TNF/COX2/COX5A/COX6B1/CYP2E1/FAS/IL1B/LEP/BAX/NFKB1/FOS/GSK3A/INS/IKBKB/IL6/PPARG/AKT1/RAC1/ADIPOQ/MAPK14/NR1H3/PPARA/PRKAG2/XBP1/AKT2/AKT3/DDIT3/FASLG/IRS2/SREBF1/INSR/CDC42/SDHA/SDHB/SDHD	36
hsa04728	Dopaminergic synapse	33/407	132/8584	1.04869e-15	4.02436e-14	1.25567e-14	CACNA1D/GRIN2A/ADCY5/CACNA1C/DRD1/DRD2/DRD3/DRD4/DRD5/FOS/GSK3A/MAOB/PPP1R1B/SCN1A/CACNA1A/AKT1/PRKCA/COMT/GRIN2B/SLC18A2/MAOA/SLC6A3/GRIA1/GRIA2/KCNJ5/MAPK14/CREB1/AKT2/AKT3/GNAS/DDC/TH/PRKACA	33
hsa04010	MAPK signaling pathway	50/407	301/8584	2.78179e-15	9.04393e-14	2.82187e-14	MAP2K1/FGFR2/PDGFB/TGFB1/TNF/MAPT/CACNA1D/FAS/IGF1/IL1B/NFKB1/CACNA1C/FGFR1/FOS/INS/CHUK/IKBKB/MYD88/TP53/FGF10/NGFR/CACNA1A/CACNA1F/CACNA1H/AKT1/PRKCA/EGFR/RAC1/RAC2/TGFB2/FGF2/MAPK14/TGFBR2/AKT2/AKT3/DDIT3/FASLG/FGF1/IRAK1/RET/MYC/INSR/CDC42/MAP4K4/PRKACA/CSF1/CSF1R/NTRK1/PDGFRA/PDGFRB	50
hsa05022	Pathways of neurodegeneration - multiple diseases	65/407	476/8584	2.94591e-15	9.04393e-14	2.82187e-14	PTGS2/MAP2K1/WNT5A/TNF/BCL2/MAPT/TUBA4A/COX2/COX5A/COX6B1/CACNA1D/CAT/DLG4/FAS/GRIN2A/IL1B/STX1A/BAX/NFKB1/CACNA1C/CHRNA7/GRIN1/LRRK2/NOS1/PINK1/IL6/NOS2/NEFH/NEFL/VCP/CACNA1F/PRKCA/GRIN2B/PARK7/CYBB/RAC1/SIGMAR1/GPX1/SLC6A3/SNCA/NOX1/PPIF/GRIA1/GRIA2/HSPA5/MAPK14/APAF1/ATP2A1/CASP9/CTNNB1/SLC25A4/XBP1/DDIT3/FASLG/UCHL1/ATXN1/CSNK2A1/RYR2/HTT/PRPH/SDHA/SDHB/SDHD/CSF1/CDK5R1	65
hsa05208	Chemical carcinogenesis - reactive oxygen species	42/407	223/8584	6.18007e-15	1.7248e-13	5.38169e-14	MAP2K1/SRC/COX2/COX5A/COX6B1/CAT/CYP2E1/NFKB1/FOS/CHUK/IKBKB/HIF1A/AKT1/EGFR/CYBA/NCF2/RAC1/PRKCD/GSTA4/GSTM1/GSTM2/GSTM3/GSTO1/GSTO2/GSTT1/MGST1/MGST3/NOX1/PPIF/NQO1/MAPK14/NFKBIA/ABL1/SLC25A4/AKT2/AKT3/CYP1A1/CYP1A2/SDHA/SDHB/SDHD/HMOX1	42
hsa01524	Platinum drug resistance	24/407	73/8584	1.18508e-14	3.03184e-13	9.45988e-14	BCL2/FAS/BAX/TP53/AKT1/GSTA4/GSTM1/GSTM2/GSTM3/GSTO1/GSTO2/GSTP1/GSTT1/MGST1/MGST3/CDKN2A/ABCC2/APAF1/CASP9/AKT2/AKT3/FASLG/BRCA1/CDKN1A	24
hsa05030	Cocaine addiction	20/407	49/8584	1.65581e-14	3.91026e-13	1.22007e-13	DLG4/GRIN2A/NFKB1/ADCY5/DRD1/DRD2/GRIN1/MAOB/PPP1R1B/GRIN2B/SLC18A2/MAOA/SLC6A3/GRIA2/CREB1/GNAS/DDC/TH/PRKACA/CDK5R1	20
hsa05031	Amphetamine addiction	23/407	69/8584	3.05798e-14	6.33894e-13	1.97786e-13	CACNA1D/GRIN2A/STX1A/ADCY5/CACNA1C/DRD1/FOS/GRIN1/MAOB/PPP1R1B/PRKCA/GRIN2B/SLC18A2/MAOA/SLC6A3/GRIA1/GRIA2/CREB1/GNAS/SIRT1/DDC/TH/PRKACA	23
hsa05415	Diabetic cardiomyopathy	39/407	203/8584	3.0972e-14	6.33894e-13	1.97786e-13	TGFB1/MMP9/COX2/COX5A/COX6B1/NFKB1/INS/AKT1/PRKCA/CD36/AGTR1/CYBA/CYBB/NCF2/RAC1/RAC2/PRKCD/GSR/PPIF/TGFB2/MAPK14/PPARA/AGT/ATP2A1/SLC25A4/SMAD3/TGFBR2/AKT2/AKT3/SLC2A1/ACE/COL1A1/RYR2/INSR/SDHA/SDHB/SDHD/SP1/NOS3	39
hsa05161	Hepatitis B	34/407	162/8584	1.01907e-13	1.95535e-12	6.10103e-13	MAP2K1/SRC/TGFB1/MMP9/TNF/BCL2/FAS/BAX/NFKB1/FOS/CHUK/IKBKB/IL6/MYD88/TP53/AKT1/PRKCA/TLR4/TGFB2/MAPK14/NFKBIA/APAF1/CASP9/CREB1/SMAD3/TGFBR2/AKT2/AKT3/FASLG/IRAK1/PCNA/SMAD4/MYC/CDKN1A	34
hsa05215	Prostate cancer	26/407	97/8584	2.13921e-13	3.86316e-12	1.20537e-12	MAP2K1/FGFR2/PDGFB/AR/MMP9/BCL2/IGF1/NFKB1/FGFR1/INS/CHUK/IKBKB/TP53/AKT1/EGFR/GSTP1/NFKBIA/CASP9/CREB1/CTNNB1/AKT2/AKT3/CDKN1A/HSP90AA1/PDGFRA/PDGFRB	26
hsa04936	Alcoholic liver disease	31/407	142/8584	4.27786e-13	7.29613e-12	2.27652e-12	TNF/ADH1C/ADH7/ALDH2/CYP2E1/FAS/IL1B/NFKB1/CHUK/IKBKB/IL17A/IL6/MYD88/AKT1/C3/RIPK1/TLR4/ADIPOQ/MAPK14/NFKBIA/PPARA/PRKAG2/CTNNB1/ACADM/AKT2/AKT3/FASLG/IRAK1/SREBF1/SIRT1/ALDH7A1	31
hsa04066	HIF-1 signaling pathway	27/407	109/8584	5.86043e-13	9.46922e-12	2.95456e-12	MAP2K1/IFNG/BCL2/EDN1/IGF1/NPPA/NFKB1/INS/ALDOA/IL6/NOS2/HIF1A/AKT1/PRKCA/EGFR/CYBB/TLR4/AKT2/AKT3/HK1/SLC2A1/SERPINE1/CDKN1A/INSR/EPO/HMOX1/NOS3	27
hsa04015	Rap1 signaling pathway	37/407	210/8584	2.34259e-12	3.59587e-11	1.12198e-11	MAP2K1/FGFR2/PDGFB/SRC/GRIN2A/IGF1/ADCY5/CNR1/DRD2/FGFR1/GRIN1/INS/ITGAL/ITGB2/FGF10/NGFR/AKT1/PRKCA/EGFR/GRIN2B/ADORA2A/RAC1/RAC2/FGF2/MAPK14/CTNNB1/AKT2/AKT3/FGF1/GNAS/RHOA/INSR/CDC42/CSF1/CSF1R/PDGFRA/PDGFRB	37
hsa05212	Pancreatic cancer	22/407	76/8584	2.88662e-12	4.21996e-11	1.3167e-11	MAP2K1/TGFB1/BAX/NFKB1/CHUK/IKBKB/TP53/AKT1/EGFR/RAC1/RAC2/RAD51/TGFB2/CDKN2A/CASP9/SMAD3/TGFBR2/AKT2/AKT3/SMAD4/CDKN1A/CDC42	22
hsa05163	Human cytomegalovirus infection	38/407	225/8584	4.50103e-12	6.28099e-11	1.95978e-11	PTGS2/MAP2K1/SRC/CXCR4/TNF/FAS/IL1B/BAX/NFKB1/ADCY5/CHUK/IKBKB/IL6/TP53/AKT1/PRKCA/EGFR/RIPK1/RAC1/RAC2/CDKN2A/MAPK14/NFKBIA/CASP9/CREB1/CTNNB1/AKT2/AKT3/CCL2/CCL5/FASLG/GNAS/RHOA/MYC/CDKN1A/SP1/PRKACA/PDGFRA	38
hsa04668	TNF signaling pathway	26/407	114/8584	1.22832e-11	1.63954e-10	5.11567e-11	PTGS2/MAP2K1/MMP9/TNF/EDN1/FAS/IL1B/NFKB1/FOS/CHUK/CSF2/IKBKB/IL6/AKT1/RIPK1/ICAM1/VCAM1/MAPK14/NFKBIA/CREB1/JAG1/AKT2/AKT3/CCL2/CCL5/CSF1	26
hsa01522	Endocrine resistance	24/407	98/8584	1.53017e-11	1.95735e-10	6.10727e-11	MAP2K1/ESR1/ESR2/SRC/MMP9/BCL2/IGF1/BAX/ADCY5/FOS/TP53/AKT1/EGFR/NOTCH2/CDKN2A/MAPK14/NOTCH1/JAG1/AKT2/AKT3/GNAS/CDKN1A/SP1/PRKACA	24
hsa05205	Proteoglycans in cancer	35/407	205/8584	2.40198e-11	2.94963e-10	9.20338e-11	MAP2K1/ESR1/SHH/SRC/TGFB1/WNT5A/MMP9/TNF/FAS/IGF1/FGFR1/TP53/HIF1A/AKT1/CAV3/PRKCA/EGFR/RAC1/TLR4/TGFB2/ANK2/MSN/CAV1/FGF2/MAPK14/CTNNB1/AKT2/AKT3/FASLG/RHOA/MYC/COL1A1/CDKN1A/CDC42/PRKACA	35
hsa05140	Leishmaniasis	21/407	77/8584	3.22399e-11	3.80679e-10	1.18779e-10	PTGS2/TGFB1/IFNG/TNF/IL1B/NFKB1/FOS/IL4/MYD88/NOS2/ITGB2/C3/CYBA/CYBB/NCF2/TLR4/TGFB2/MAPK14/NFKBIA/IRAK1/IL10	21
hsa05010	Alzheimer disease	50/407	384/8584	4.02118e-11	4.57223e-10	1.42662e-10	PTGS2/MAP2K1/WNT5A/TNF/MAPT/TUBA4A/COX2/COX5A/COX6B1/APOE/CACNA1D/FAS/GRIN2A/IL1B/NFKB1/ADAM17/CACNA1C/CHRNA7/GRIN1/INS/NOS1/CHUK/IKBKB/IL6/NOS2/CACNA1F/AKT1/GRIN2B/CYBB/SNCA/NOX1/PPIF/APAF1/ATP2A1/CASP9/CTNNB1/SLC25A4/XBP1/AKT2/AKT3/DDIT3/IRS2/MME/CSNK2A1/INSR/SDHA/SDHB/SDHD/CSF1/CDK5R1	50
hsa04020	Calcium signaling pathway	39/407	253/8584	4.25361e-11	4.66377e-10	1.45518e-10	FGFR2/PDGFB/CXCR4/CACNA1D/GRIN2A/ADRB2/CACNA1C/CHRNA7/DRD1/DRD5/FGFR1/GRIN1/HTR2A/HTR2C/NOS1/NOS2/FGF10/CACNA1A/CACNA1F/CACNA1H/PRKCA/AGTR1/EGFR/GRIN2B/ADORA2A/PPIF/FGF2/ATP2A1/SLC25A4/FGF1/GNAS/RET/RYR2/CASQ2/PRKACA/NTRK1/PDGFRA/PDGFRB/NOS3	39
hsa05225	Hepatocellular carcinoma	31/407	168/8584	4.5081e-11	4.77236e-10	1.48906e-10	MAP2K1/TGFB1/WNT5A/BAX/TP53/AKT1/PRKCA/EGFR/GSTA4/GSTM1/GSTM2/GSTM3/GSTO1/GSTO2/GSTP1/GSTT1/MGST1/MGST3/TGFB2/NQO1/CDKN2A/CTNNB1/SMAD3/TGFBR2/AKT2/AKT3/SMAD4/MYC/CDKN1A/HMOX1/TERT	31
hsa04931	Insulin resistance	24/407	108/8584	1.38205e-10	1.4143e-09	4.41287e-10	TNF/NFKB1/INS/IKBKB/IL6/AKT1/CD36/PRKCD/NFKBIA/NR1H2/NR1H3/PPARA/PRKAG2/AGT/CREB1/PYGL/AKT2/AKT3/IRS2/PYGM/SLC2A1/SREBF1/INSR/NOS3	24
hsa05210	Colorectal cancer	21/407	86/8584	3.12135e-10	3.09114e-09	9.64492e-10	MAP2K1/TGFB1/BCL2/BAX/FOS/TP53/AKT1/EGFR/RAC1/RAC2/TGFB2/CASP9/CTNNB1/SMAD3/TGFBR2/AKT2/AKT3/RHOA/SMAD4/MYC/CDKN1A	21
hsa00983	Drug metabolism - other enzymes	20/407	80/8584	5.29393e-10	4.91089e-09	1.53229e-09	CYP2E1/CYP3A4/MPO/TPMT/GSTA4/GSTM1/GSTM2/GSTM3/GSTO1/GSTO2/GSTP1/GSTT1/MGST1/MGST3/RRM2B/DPYD/HPRT1/TYMP/XDH/IMPDH1	20
hsa00982	Drug metabolism - cytochrome P450	19/407	72/8584	5.30017e-10	4.91089e-09	1.53229e-09	ADH1C/ADH7/CYP2E1/CYP3A4/MAOB/GSTA4/GSTK1/GSTM1/GSTM2/GSTM3/GSTO1/GSTO2/GSTP1/GSTT1/HPGDS/MGST1/MGST3/MAOA/CYP1A2	19
hsa05144	Malaria	16/407	50/8584	5.43877e-10	4.91089e-09	1.53229e-09	TGFB1/IFNG/TNF/IL1B/CD40/IL6/MYD88/ITGAL/ITGB2/CD36/TLR4/TGFB2/ICAM1/VCAM1/CCL2/IL10	16
hsa04380	Osteoclast differentiation	26/407	135/8584	6.6264e-10	5.8123e-09	1.81354e-09	MAP2K1/TGFB1/IFNG/TNF/IL1B/NFKB1/FOS/LILRB1/CHUK/IKBKB/PPARG/AKT1/CYBA/NCF2/RAC1/NOX1/TGFB2/MAPK14/NFKBIA/ATP2A1/CREB1/TGFBR2/AKT2/AKT3/CSF1/CSF1R	26
hsa05166	Human T-cell leukemia virus 1 infection	34/407	222/8584	9.6032e-10	8.1894e-09	2.55524e-09	MAP2K1/TGFB1/TNF/BAX/NFKB1/ADCY5/FOS/CD40/CHUK/CSF2/IKBKB/IL2/IL6/ITGAL/ITGB2/TP53/AKT1/TGFB2/TSPO/ICAM1/CDKN2A/NFKBIA/CREB1/SLC25A4/SMAD3/TGFBR2/AKT2/AKT3/SLC2A1/SMAD4/MYC/CDKN1A/PRKACA/TERT	34
hsa04014	Ras signaling pathway	35/407	236/8584	1.30829e-09	1.08553e-08	3.38704e-09	MAP2K1/FGFR2/PDGFB/GRIN2A/IGF1/NFKB1/FGFR1/GRIN1/INS/CHUK/IKBKB/FGF10/NGFR/AKT1/PRKCA/EGFR/GRIN2B/RAC1/RAC2/FGF2/ABL1/AKT2/AKT3/FASLG/FGF1/RHOA/INSR/CDC42/PRKACA/CSF1/CSF1R/NTRK1/PDGFRA/PDGFRB/PLA2G2A	35
hsa05020	Prion disease	38/407	272/8584	1.42416e-09	1.12991e-08	3.52551e-09	TNF/TUBA4A/COX2/COX5A/COX6B1/CACNA1D/GRIN2A/IL1B/BAX/CACNA1C/GRIN1/IL6/CACNA1F/CAV3/GRIN2B/CYBA/CYBB/NCF2/RAC1/RAC2/PRKCD/PPIF/CAV1/HSPA5/MAPK14/NOTCH1/APAF1/CASP9/CREB1/SLC25A4/CCL5/DDIT3/CSNK2A1/RYR2/SDHA/SDHB/SDHD/PRKACA	38
hsa05220	Chronic myeloid leukemia	19/407	76/8584	1.44395e-09	1.12991e-08	3.52551e-09	MAP2K1/TGFB1/BAX/NFKB1/CHUK/IKBKB/TP53/AKT1/TGFB2/CDKN2A/NFKBIA/ABL1/SMAD3/TGFBR2/AKT2/AKT3/SMAD4/MYC/CDKN1A	19
hsa05145	Toxoplasmosis	23/407	111/8584	1.47219e-09	1.12991e-08	3.52551e-09	TGFB1/IFNG/TNF/BCL2/NFKB1/ALOX5/CD40/CHUK/IKBKB/MYD88/NOS2/AKT1/TLR4/PPIF/TGFB2/MAPK14/NFKBIA/CASP9/PIK3CG/AKT2/AKT3/IRAK1/IL10	23
hsa04151	PI3K-Akt signaling pathway	44/407	359/8584	4.53391e-09	3.3949e-08	1.05927e-08	MAP2K1/FGFR2/PDGFB/BCL2/IGF1/NFKB1/FGFR1/INS/CHUK/IKBKB/IL2/IL4/IL6/TP53/FGF10/NGFR/AKT1/PRKCA/EGFR/RAC1/TLR4/FGF2/CASP9/CREB1/PIK3CG/AKT2/AKT3/FASLG/FGF1/YWHAE/RET/BRCA1/MYC/COL1A1/CDKN1A/HSP90AA1/INSR/EPO/CSF1/CSF1R/NTRK1/PDGFRA/PDGFRB/NOS3	44
hsa00480	Glutathione metabolism	16/407	57/8584	4.7071e-09	3.44066e-08	1.07355e-08	GGT1/GPX1/GSR/GSTA4/GSTK1/GSTM1/GSTM2/GSTM3/GSTO1/GSTO2/GSTP1/GSTT1/HPGDS/MGST1/MGST3/RRM2B	16
hsa05143	African trypanosomiasis	13/407	37/8584	6.37338e-09	4.5503e-08	1.41977e-08	IFNG/TNF/FAS/IL1B/NPPA/IL6/MYD88/PRKCA/ICAM1/VCAM1/APOA1/FASLG/IL10	13
hsa04068	FoxO signaling pathway	24/407	131/8584	8.67865e-09	6.05533e-08	1.88937e-08	MAP2K1/TGFB1/CAT/IGF1/INS/CHUK/IKBKB/IL6/AKT1/EGFR/TGFB2/MAPK14/PRKAG2/SMAD3/TGFBR2/AKT2/AKT3/FASLG/IRS2/SMAD4/SIRT1/CDKN1A/INSR/IL10	24
hsa04080	Neuroactive ligand-receptor interaction	44/407	367/8584	8.9783e-09	6.1252e-08	1.91117e-08	NR3C1/TRPV1/ADORA1/EDN1/GRIN2A/LEP/ADRB2/APLN/AVPR2/CALCA/CHRNA7/CNR1/CRH/CRHR1/DRD1/DRD2/DRD3/DRD4/DRD5/GHRL/GRIN1/HRH3/HTR1A/HTR2A/HTR2C/TAC1/C3/CNR2/F2/AGTR1/GRIN2B/PLG/ADORA2A/CHRNA3/CHRNA4/CHRNB4/OPRM1/AVP/HCRT/TSPO/GRIA1/GRIA2/GCG/AGT	44
hsa04657	IL-17 signaling pathway	20/407	94/8584	1.09321e-08	7.29599e-08	2.27648e-08	PTGS2/IFNG/MMP9/TNF/IL1B/NFKB1/FOS/CHUK/CSF2/IKBKB/IL17A/IL4/IL6/S100A9/MAPK14/NFKBIA/CCL2/LCN2/S100A8/HSP90AA1	20
hsa04725	Cholinergic synapse	22/407	113/8584	1.14476e-08	7.47749e-08	2.33311e-08	MAP2K1/BCL2/CACNA1D/KCNQ1/ADCY5/CACNA1C/CHRNA7/FOS/CACNA1A/CACNA1F/AKT1/PRKCA/ACHE/CHRNA3/CHRNA4/CHRNB4/CREB1/PIK3CG/AKT2/AKT3/SLC5A7/PRKACA	22
hsa04261	Adrenergic signaling in cardiomyocytes	26/407	154/8584	1.23476e-08	7.89733e-08	2.46411e-08	ATP1A1/BCL2/CACNA1D/KCNQ1/SCN5A/ADCY5/ADRB2/ATP1A3/CACNA1C/TPM1/SCN1B/CACNA1F/AKT1/PRKCA/AGTR1/ATP1A2/MAPK14/AGT/ATP2A1/CREB1/PIK3CG/AKT2/AKT3/GNAS/RYR2/PRKACA	26
hsa00980	Metabolism of xenobiotics by cytochrome P450	18/407	78/8584	1.552e-08	9.72377e-08	3.03399e-08	ADH1C/ADH7/CYP2E1/CYP3A4/GSTA4/GSTK1/GSTM1/GSTM2/GSTM3/GSTO1/GSTO2/GSTP1/GSTT1/HPGDS/MGST1/MGST3/CYP1A1/CYP1A2	18
hsa04726	Serotonergic synapse	22/407	115/8584	1.60631e-08	9.86272e-08	3.07734e-08	PTGS1/PTGS2/MAP2K1/CACNA1D/ADCY5/CACNA1C/HTR1A/HTR2A/HTR2C/HTR3A/MAOB/ALOX5/CACNA1A/CACNA1F/PRKCA/SLC18A2/SLC6A4/MAOA/KCNJ5/GNAS/DDC/PRKACA	22
hsa05204	Chemical carcinogenesis - DNA adducts	17/407	70/8584	1.72234e-08	1.03678e-07	3.23494e-08	PTGS2/CYP2E1/CYP3A4/GSTA4/GSTK1/GSTM1/GSTM2/GSTM3/GSTO1/GSTO2/GSTP1/GSTT1/HPGDS/MGST1/MGST3/CYP1A1/CYP1A2	17
hsa05135	Yersinia infection	24/407	137/8584	2.16776e-08	1.25637e-07	3.92009e-08	MAP2K1/SRC/TNF/IL1B/NFKB1/FOS/CHUK/IKBKB/IL2/IL6/MYD88/AKT1/RAC1/RAC2/TLR4/MAPK14/NFKBIA/AKT2/AKT3/CCL2/IRAK1/RHOA/CDC42/IL10	24
hsa05152	Tuberculosis	28/407	180/8584	2.16897e-08	1.25637e-07	3.92009e-08	SRC/TGFB1/VDR/IFNG/TNF/BCL2/IL1B/BAX/CYP27B1/NFKB1/IL6/MYD88/NOS2/ITGB2/AKT1/C3/TLR4/TGFB2/MAPK14/APAF1/CASP9/CREB1/AKT2/AKT3/IRAK1/RHOA/HSPD1/IL10	28
hsa05218	Melanoma	17/407	72/8584	2.7157e-08	1.54393e-07	4.81732e-08	MAP2K1/PDGFB/IGF1/BAX/FGFR1/TP53/FGF10/AKT1/EGFR/CDKN2A/FGF2/AKT2/AKT3/FGF1/CDKN1A/PDGFRA/PDGFRB	17
hsa05167	Kaposi sarcoma-associated herpesvirus infection	29/407	194/8584	3.01129e-08	1.66278e-07	5.18817e-08	PTGS2/MAP2K1/PDGFB/SRC/FAS/BAX/NFKB1/FOS/CHUK/CSF2/IKBKB/IL6/TP53/HIF1A/AKT1/C3/RAC1/ICAM1/FGF2/MAPK14/NFKBIA/CASP9/CREB1/CTNNB1/PIK3CG/AKT2/AKT3/MYC/CDKN1A	29
hsa04926	Relaxin signaling pathway	23/407	129/8584	3.04386e-08	1.66278e-07	5.18817e-08	MAP2K1/SRC/TGFB1/MMP9/EDN1/NFKB1/ADCY5/FOS/NOS1/NOS2/AKT1/PRKCA/EGFR/MAPK14/NFKBIA/CREB1/TGFBR2/AKT2/AKT3/GNAS/COL1A1/PRKACA/NOS3	23
hsa04722	Neurotrophin signaling pathway	22/407	119/8584	3.08725e-08	1.66278e-07	5.18817e-08	MAP2K1/BCL2/BAX/NFKB1/IKBKB/TP53/NGFR/AKT1/RAC1/PRKCD/MAPK14/NFKBIA/ABL1/AKT2/AKT3/FASLG/IRAK1/RHOA/YWHAE/CDC42/NTRK1/SORT1	22
hsa04923	Regulation of lipolysis in adipocytes	15/407	58/8584	4.86211e-08	2.57357e-07	8.02999e-08	PTGS1/PTGS2/ADORA1/NPPA/ADCY5/ADRB2/INS/AKT1/PNPLA2/AKT2/AKT3/GNAS/IRS2/INSR/PRKACA	15
hsa04620	Toll-like receptor signaling pathway	20/407	104/8584	6.65877e-08	3.46482e-07	1.08109e-07	MAP2K1/TNF/IL1B/NFKB1/FOS/CD40/CHUK/IKBKB/IL6/MYD88/AKT1/RIPK1/RAC1/TLR4/MAPK14/NFKBIA/AKT2/AKT3/CCL5/IRAK1	20
hsa04022	cGMP-PKG signaling pathway	26/407	167/8584	6.88785e-08	3.52429e-07	1.09964e-07	ATP1A1/MAP2K1/ADORA1/CACNA1D/NPPA/ADCY5/ADRB2/ATP1A3/CACNA1C/INS/CACNA1F/AKT1/AGTR1/PDE5A/ATP1A2/PPIF/ATP2A1/CREB1/PIK3CG/SLC25A4/AKT2/AKT3/IRS2/RHOA/INSR/NOS3	26
hsa04911	Insulin secretion	18/407	86/8584	7.8425e-08	3.94697e-07	1.23152e-07	ATP1A1/CACNA1D/STX1A/ADCY5/ATP1A3/CACNA1C/INS/CACNA1F/PRKCA/KCNJ11/ATP1A2/ABCC8/GCG/CREB1/GNAS/SLC2A1/RYR2/PRKACA	18
hsa05224	Breast cancer	24/407	147/8584	8.83481e-08	4.37466e-07	1.36497e-07	MAP2K1/ESR1/ESR2/WNT5A/IGF1/BAX/FGFR1/FOS/TP53/FGF10/AKT1/EGFR/NOTCH2/FGF2/NOTCH1/CTNNB1/JAG1/AKT2/AKT3/FGF1/BRCA1/MYC/CDKN1A/SP1	24
hsa05162	Measles	23/407	138/8584	1.11628e-07	5.43631e-07	1.69623e-07	BCL2/FAS/IL1B/BAX/NFKB1/FOS/CHUK/IKBKB/IL2/IL6/MYD88/TP53/AKT1/TLR4/MSN/NFKBIA/APAF1/CASP9/AKT2/AKT3/FASLG/IRAK1/CSNK2A1	23
hsa05230	Central carbon metabolism in cancer	16/407	70/8584	1.14144e-07	5.43631e-07	1.69623e-07	MAP2K1/FGFR2/FGFR1/TP53/HIF1A/AKT1/EGFR/AKT2/AKT3/HK1/SLC2A1/RET/MYC/NTRK1/PDGFRA/PDGFRB	16
hsa05226	Gastric cancer	24/407	149/8584	1.15101e-07	5.43631e-07	1.69623e-07	MAP2K1/FGFR2/SHH/TGFB1/WNT5A/BCL2/BAX/TP53/FGF10/AKT1/EGFR/TGFB2/FGF2/ABCB1/CTNNB1/SMAD3/TGFBR2/AKT2/AKT3/FGF1/SMAD4/MYC/CDKN1A/TERT	24
hsa01521	EGFR tyrosine kinase inhibitor resistance	17/407	79/8584	1.17789e-07	5.47896e-07	1.70953e-07	MAP2K1/FGFR2/PDGFB/SRC/BCL2/IGF1/BAX/IL6/AKT1/PRKCA/EGFR/FGF2/AKT2/AKT3/NRG1/PDGFRA/PDGFRB	17
hsa04930	Type II diabetes mellitus	13/407	46/8584	1.23138e-07	5.6423e-07	1.7605e-07	TNF/CACNA1D/CACNA1C/INS/IKBKB/CACNA1A/PRKCD/KCNJ11/ABCC8/ADIPOQ/HK1/IRS2/INSR	13
hsa04211	Longevity regulating pathway	18/407	89/8584	1.36613e-07	6.16769e-07	1.92443e-07	CAT/IGF1/BAX/NFKB1/ADCY5/INS/PPARG/TP53/AKT1/ADIPOQ/PRKAG2/CREB1/AKT2/AKT3/IRS2/SIRT1/INSR/PRKACA	18
hsa05169	Epstein-Barr virus infection	28/407	202/8584	2.67884e-07	1.19189e-06	3.71891e-07	NEDD4/TNF/BCL2/FAS/BAX/NFKB1/CD40/CHUK/FCER2/IKBKB/IL6/MYD88/ITGAL/TP53/AKT1/RIPK1/RAC1/ICAM1/MAPK14/NFKBIA/APAF1/CASP9/AKT2/AKT3/IRAK1/VIM/MYC/CDKN1A	28
hsa05012	Parkinson disease	33/407	266/8584	3.25001e-07	1.42536e-06	4.44738e-07	MAPT/TUBA4A/COX2/COX5A/COX6B1/BAX/ADCY5/DRD1/DRD2/LRRK2/MAOB/PINK1/TP53/PARK7/ADORA2A/SLC18A2/MAOA/SLC6A3/SNCA/PPIF/HSPA5/APAF1/CASP9/SLC25A4/XBP1/DDIT3/GNAS/UCHL1/SDHA/SDHB/SDHD/TH/PRKACA	33
hsa05160	Hepatitis C	24/407	158/8584	3.55999e-07	1.53932e-06	4.80295e-07	MAP2K1/IFNG/TNF/FAS/BAX/NFKB1/CHUK/IKBKB/TP53/AKT1/EGFR/RIPK1/NFKBIA/NR1H3/PPARA/APAF1/CASP9/CTNNB1/AKT2/AKT3/FASLG/YWHAE/MYC/CDKN1A	24
hsa04210	Apoptosis	22/407	136/8584	3.62773e-07	1.54682e-06	4.82636e-07	MAP2K1/TNF/BCL2/TUBA4A/FAS/BAX/NFKB1/FOS/CHUK/IKBKB/TP53/AKT1/RIPK1/NFKBIA/APAF1/CASP9/AIFM1/AKT2/AKT3/DDIT3/FASLG/NTRK1	22
hsa05164	Influenza A	25/407	171/8584	4.27742e-07	1.79886e-06	5.61277e-07	MAP2K1/IFNG/TNF/FAS/IL1B/BAX/NFKB1/CHUK/IKBKB/IL6/MYD88/AKT1/PRKCA/PLG/TLR4/ICAM1/NFKBIA/APAF1/CASP9/SLC25A4/AKT2/AKT3/CCL2/CCL5/FASLG	25
hsa04920	Adipocytokine signaling pathway	15/407	69/8584	5.73201e-07	2.3463e-06	7.32089e-07	TNF/LEP/NFKB1/CHUK/IKBKB/AKT1/CD36/ADIPOQ/NFKBIA/PPARA/PRKAG2/AKT2/AKT3/IRS2/SLC2A1	15
hsa04924	Renin secretion	15/407	69/8584	5.73201e-07	2.3463e-06	7.32089e-07	ADORA1/CACNA1D/EDN1/NPPA/ADCY5/ADRB2/CACNA1C/AQP1/CACNA1F/AGTR1/AGT/CREB1/GNAS/ACE/PRKACA	15
hsa01523	Antifolate resistance	10/407	30/8584	6.57901e-07	2.65757e-06	8.2921e-07	DHFR/TNF/IL1B/NFKB1/CHUK/IKBKB/IL6/ABCC2/SLC19A1/MTHFR	10
hsa04919	Thyroid hormone signaling pathway	20/407	121/8584	8.7193e-07	3.4764e-06	1.0847e-06	ATP1A1/MAP2K1/ESR1/SRC/ATP1A3/TP53/HIF1A/AKT1/PRKCA/NOTCH2/ATP1A2/NOTCH1/ATP2A1/CASP9/CTNNB1/AKT2/AKT3/SLC2A1/MYC/PRKACA	20
hsa05134	Legionellosis	13/407	56/8584	1.48196e-06	5.83285e-06	1.81995e-06	TNF/IL1B/NFKB1/IL6/MYD88/ITGB2/VCP/C3/TLR4/NFKBIA/APAF1/CASP9/HSPD1	13
hsa04915	Estrogen signaling pathway	21/407	137/8584	1.66675e-06	6.47712e-06	2.02098e-06	MAP2K1/ESR1/ESR2/SRC/MMP9/BCL2/ADCY5/FOS/AKT1/EGFR/OPRM1/PRKCD/KCNJ5/CREB1/AKT2/AKT3/GNAS/HSP90AA1/SP1/PRKACA/NOS3	21
hsa04713	Circadian entrainment	17/407	97/8584	2.53283e-06	9.71972e-06	3.03273e-06	CACNA1D/GRIN2A/ADCY5/CACNA1C/FOS/GRIN1/NOS1/CACNA1H/PRKCA/GRIN2B/GRIA1/GRIA2/KCNJ5/CREB1/GNAS/RYR2/PRKACA	17
hsa00380	Tryptophan metabolism	11/407	42/8584	2.68866e-06	1.01904e-05	3.17957e-06	ALDH2/CAT/MAOB/MAOA/DLD/GCDH/CYP1A1/ALDH7A1/CYP1A2/DDC/DLST	11
hsa04659	Th17 cell differentiation	18/407	108/8584	2.72876e-06	1.02162e-05	3.18764e-06	TGFB1/IFNG/IL1B/NFKB1/FOS/CHUK/IKBKB/IL17A/IL2/IL4/IL6/HIF1A/MAPK14/NFKBIA/SMAD3/TGFBR2/SMAD4/HSP90AA1	18
hsa04370	VEGF signaling pathway	13/407	59/8584	2.78688e-06	1.03081e-05	3.21631e-06	PTGS2/MAP2K1/SRC/AKT1/PRKCA/RAC1/RAC2/MAPK14/CASP9/AKT2/AKT3/CDC42/NOS3	13
hsa04979	Cholesterol metabolism	12/407	51/8584	3.23696e-06	1.18303e-05	3.69126e-06	LRP2/APOE/CYP27A1/CD36/LIPA/TSPO/ABCA1/APOA1/APOC3/PCSK9/SORT1/APOC2	12
hsa05235	PD-L1 expression and PD-1 checkpoint pathway in cancer	16/407	89/8584	3.54162e-06	1.27915e-05	3.99118e-06	MAP2K1/IFNG/NFKB1/FOS/CHUK/IKBKB/MYD88/HIF1A/AKT1/EGFR/TLR4/MAPK14/NFKBIA/AKT2/AKT3/CSNK2A1	16
hsa00350	Tyrosine metabolism	10/407	36/8584	4.30745e-06	1.53766e-05	4.79777e-06	ADH1C/ADH7/TPO/MAOB/TYR/COMT/DBH/MAOA/DDC/TH	10
hsa05222	Small cell lung cancer	16/407	92/8584	5.55023e-06	1.95853e-05	6.11096e-06	PTGS2/BCL2/BAX/NFKB1/CHUK/IKBKB/NOS2/TP53/AKT1/NFKBIA/APAF1/CASP9/AKT2/AKT3/MYC/CDKN1A	16
hsa05132	Salmonella infection	29/407	249/8584	6.17705e-06	2.15495e-05	6.72382e-06	MAP2K1/TNF/BCL2/TUBA4A/IL1B/BAX/NFKB1/FOS/CHUK/IKBKB/IL6/MYD88/AKT1/RIPK1/RAC1/TLR4/MAPK14/NFKBIA/CTNNB1/PIK3CG/AKT2/AKT3/IRAK1/RHOA/DYNC1H1/MYC/HSP90AA1/CDC42/PODXL	29
hsa05323	Rheumatoid arthritis	16/407	93/8584	6.41735e-06	2.21363e-05	6.90691e-06	TGFB1/IFNG/TNF/IL1B/FOS/CSF2/IL17A/IL6/ITGAL/ITGB2/TLR4/TGFB2/ICAM1/CCL2/CCL5/CSF1	16
hsa05130	Pathogenic Escherichia coli infection	25/407	198/8584	6.62081e-06	2.25843e-05	7.04671e-06	SRC/TNF/TUBA4A/FAS/IL1B/BAX/NFKB1/FOS/CHUK/IKBKB/IL6/MYD88/F2/RIPK1/RAC1/TLR4/MAPK14/NFKBIA/ABL1/CASP9/FASLG/IRAK1/RHOA/CDC42/MYO5A	25
hsa04625	C-type lectin receptor signaling pathway	17/407	104/8584	6.7804e-06	2.28745e-05	7.13726e-06	PTGS2/SRC/TNF/IL1B/NFKB1/CHUK/IKBKB/IL2/IL6/AKT1/PRKCD/MAPK14/NFKBIA/AKT2/AKT3/RHOA/IL10	17
hsa04927	Cortisol synthesis and secretion	13/407	65/8584	8.72057e-06	2.87873e-05	8.98214e-06	CYP17A1/CACNA1D/ADCY5/CACNA1C/PDE8B/CACNA1F/CACNA1H/AGTR1/AGT/CREB1/GNAS/SP1/PRKACA	13
hsa05321	Inflammatory bowel disease	13/407	65/8584	8.72057e-06	2.87873e-05	8.98214e-06	TGFB1/IFNG/TNF/IL1B/NFKB1/IL17A/IL2/IL4/IL6/TLR4/TGFB2/SMAD3/IL10	13
hsa04928	Parathyroid hormone synthesis, secretion and action	17/407	106/8584	8.8292e-06	2.88358e-05	8.99728e-06	MAP2K1/VDR/BCL2/CYP27B1/ADCY5/FGFR1/FOS/PRKCA/EGFR/PDE4A/CREB1/GNAS/RHOA/CDKN1A/SP1/PRKACA/BGLAP	17
hsa05214	Glioma	14/407	75/8584	9.18284e-06	2.96751e-05	9.25915e-06	MAP2K1/PDGFB/IGF1/BAX/TP53/AKT1/PRKCA/EGFR/CDKN2A/AKT2/AKT3/CDKN1A/PDGFRA/PDGFRB	14
hsa05133	Pertussis	14/407	76/8584	1.07784e-05	3.44683e-05	1.07547e-05	TNF/IL1B/NFKB1/FOS/IL6/MYD88/NOS2/ITGB2/C3/TLR4/MAPK14/IRAK1/RHOA/IL10	14
hsa04062	Chemokine signaling pathway	24/407	192/8584	1.20506e-05	3.81394e-05	1.19002e-05	MAP2K1/SRC/CXCR4/NFKB1/ADCY5/GSK3A/CHUK/IKBKB/AKT1/RAC1/RAC2/PRKCD/NFKBIA/CX3CR1/PIK3CG/AKT2/AKT3/CCL2/CCL5/GRK5/GRK6/RHOA/CDC42/PRKACA	24
hsa04934	Cushing syndrome	21/407	155/8584	1.22969e-05	3.85219e-05	1.20195e-05	MAP2K1/WNT5A/CYP17A1/CACNA1D/ADCY5/CACNA1C/CRH/CRHR1/PDE8B/CACNA1F/CACNA1H/AGTR1/EGFR/CDKN2A/AGT/CREB1/CTNNB1/GNAS/CDKN1A/SP1/PRKACA	21
hsa04925	Aldosterone synthesis and secretion	16/407	98/8584	1.28429e-05	3.94278e-05	1.23022e-05	ATP1A1/CACNA1D/NPPA/ADCY5/ATP1A3/CACNA1C/CACNA1F/CACNA1H/PRKCA/AGTR1/ATP1A2/KCNJ5/AGT/CREB1/GNAS/PRKACA	16
hsa05231	Choline metabolism in cancer	16/407	98/8584	1.28429e-05	3.94278e-05	1.23022e-05	MAP2K1/PDGFB/FOS/HIF1A/AKT1/PRKCA/EGFR/RAC1/RAC2/AKT2/AKT3/SLC5A7/SP1/PDGFRA/PDGFRB/PCYT1A	16
hsa04540	Gap junction	15/407	88/8584	1.40249e-05	4.22074e-05	1.31695e-05	MAP2K1/PDGFB/SRC/TUBA4A/ADCY5/DRD1/DRD2/HTR2A/HTR2C/PRKCA/EGFR/GNAS/PRKACA/PDGFRA/PDGFRB	15
hsa04152	AMPK signaling pathway	18/407	121/8584	1.41608e-05	4.22074e-05	1.31695e-05	HMGCR/FBP1/IGF1/LEP/INS/PPARG/CFTR/AKT1/CD36/ADIPOQ/PRKAG2/CREB1/AKT2/AKT3/IRS2/SREBF1/SIRT1/INSR	18
hsa04660	T cell receptor signaling pathway	18/407	121/8584	1.41608e-05	4.22074e-05	1.31695e-05	MAP2K1/IFNG/TNF/NFKB1/FOS/CHUK/CSF2/IKBKB/IL2/IL4/AKT1/MAPK14/NFKBIA/AKT2/AKT3/RHOA/CDC42/IL10	18
hsa05219	Bladder cancer	10/407	41/8584	1.53502e-05	4.53126e-05	1.41383e-05	MAP2K1/SRC/MMP9/TP53/DAPK2/EGFR/CDKN2A/TYMP/MYC/CDKN1A	10
hsa05410	Hypertrophic cardiomyopathy	15/407	90/8584	1.85552e-05	5.4252e-05	1.69276e-05	TGFB1/TNF/CACNA1D/EDN1/IGF1/CACNA1C/TPM1/IL6/CACNA1F/TGFB2/PRKAG2/AGT/ATP2A1/ACE/RYR2	15
hsa04917	Prolactin signaling pathway	13/407	70/8584	2.03062e-05	5.83399e-05	1.82031e-05	MAP2K1/ESR1/ESR2/SRC/CYP17A1/NFKB1/FOS/INS/AKT1/MAPK14/AKT2/AKT3/TH	13
hsa04913	Ovarian steroidogenesis	11/407	51/8584	2.03335e-05	5.83399e-05	1.82031e-05	PTGS2/CYP19A1/CYP17A1/IGF1/ADCY5/INS/ALOX5/GNAS/CYP1A1/INSR/PRKACA	11
hsa04072	Phospholipase D signaling pathway	20/407	148/8584	2.05836e-05	5.85107e-05	1.82564e-05	MAP2K1/PDGFB/ADCY5/AVPR2/INS/AKT1/PRKCA/F2/AGTR1/EGFR/AVP/AGT/PIK3CG/AKT2/AKT3/GNAS/RHOA/INSR/PDGFRA/PDGFRB	20
hsa05146	Amoebiasis	16/407	102/8584	2.15888e-05	6.08052e-05	1.89723e-05	TGFB1/IFNG/TNF/IL1B/NFKB1/CSF2/IL6/NOS2/ITGB2/PRKCA/TLR4/TGFB2/GNAS/COL1A1/IL10/PRKACA	16
hsa05170	Human immunodeficiency virus 1 infection	25/407	212/8584	2.19975e-05	6.1393e-05	1.91557e-05	MAP2K1/CXCR4/TNF/BCL2/FAS/BAX/NFKB1/FOS/CHUK/IKBKB/MYD88/AKT1/PRKCA/RIPK1/RAC1/RAC2/TLR4/MAPK14/NFKBIA/CASP9/AKT2/AKT3/FASLG/IRAK1/SAMHD1	25
hsa04213	Longevity regulating pathway - multiple species	12/407	61/8584	2.30849e-05	6.38475e-05	1.99215e-05	CAT/IGF1/ADCY5/INS/AKT1/PRKAG2/AKT2/AKT3/IRS2/SIRT1/INSR/PRKACA	12
hsa04670	Leukocyte transendothelial migration	17/407	115/8584	2.66314e-05	7.29986e-05	2.27769e-05	CXCR4/MMP9/ITGAL/ITGB2/PRKCA/CYBA/CYBB/NCF2/RAC1/RAC2/ICAM1/MSN/VCAM1/MAPK14/CTNNB1/RHOA/CDC42	17
hsa04064	NF-kappa B signaling pathway	16/407	104/8584	2.76856e-05	7.52167e-05	2.34689e-05	PTGS2/TNF/BCL2/IL1B/NFKB1/CD40/CHUK/IKBKB/MYD88/RIPK1/TLR4/ICAM1/VCAM1/NFKBIA/IRAK1/CSNK2A1	16
hsa04921	Oxytocin signaling pathway	20/407	154/8584	3.7006e-05	9.96566e-05	3.10946e-05	PTGS2/MAP2K1/SRC/CACNA1D/NPPA/ADCY5/CACNA1C/FOS/CACNA1F/PRKCA/EGFR/KCNJ5/PRKAG2/PIK3CG/GNAS/RHOA/RYR2/CDKN1A/PRKACA/NOS3	20
hsa04929	GnRH secretion	12/407	64/8584	3.8251e-05	0.000102114	3.18613e-05	MAP2K1/ESR2/CACNA1D/CACNA1C/CACNA1F/CACNA1H/AKT1/PRKCA/KCNJ11/KCNJ5/AKT2/AKT3	12
hsa05131	Shigellosis	27/407	247/8584	4.07506e-05	0.000107849	3.36507e-05	SRC/TNF/BCL2/IL1B/BAX/NFKB1/GSK3A/CHUK/CSF2/IKBKB/MYD88/TP53/AKT1/C3/EGFR/RIPK1/RAC1/TLR4/PRKCD/MAPK14/NFKBIA/AKT2/AKT3/CCL5/HK1/RHOA/CDC42	27
hsa05017	Spinocerebellar ataxia	19/407	143/8584	4.20178e-05	0.000109669	3.42188e-05	GRIN2A/KCND3/GRIN1/CACNA1A/AKT1/PRKCA/GRIN2B/PPIF/GRIA1/GRIA2/AFG3L2/ATP2A1/SLC25A4/VLDLR/XBP1/AKT2/AKT3/ATXN1/SP1	19
hsa05216	Thyroid cancer	9/407	37/8584	4.21531e-05	0.000109669	3.42188e-05	MAP2K1/BAX/PPARG/TP53/CTNNB1/RET/MYC/CDKN1A/NTRK1	9
hsa04918	Thyroid hormone synthesis	13/407	75/8584	4.36403e-05	0.000112585	3.51284e-05	ATP1A1/LRP2/TPO/ADCY5/ATP1A3/PRKCA/GPX1/GSR/ATP1A2/HSPA5/CREB1/GNAS/PRKACA	13
hsa04935	Growth hormone synthesis, secretion and action	17/407	120/8584	4.66121e-05	0.000119249	3.72079e-05	MAP2K1/CACNA1D/IGF1/ADCY5/CACNA1C/FOS/GHRL/CACNA1F/AKT1/PRKCA/MAPK14/CREB1/AKT2/AKT3/GNAS/IRS2/PRKACA	17
hsa05014	Amyotrophic lateral sclerosis	35/407	364/8584	4.76859e-05	0.000120988	3.77505e-05	TNF/BCL2/TUBA4A/COX2/COX5A/COX6B1/CAT/GRIN2A/BAX/GRIN1/NOS1/PINK1/NOS2/TP53/NEFH/NEFL/VCP/ANG/GRIN2B/RAC1/SIGMAR1/GPX1/GRIA1/GRIA2/HSPA5/MAPK14/APAF1/CASP9/XBP1/DDIT3/NRG1/PRPH/SDHA/SDHB/SDHD	35
hsa04973	Carbohydrate digestion and absorption	10/407	47/8584	5.49208e-05	0.000138202	4.31216e-05	ATP1A1/CACNA1D/ATP1A3/MGAM/AKT1/ATP1A2/AKT2/AKT3/HK1/SI	10
hsa00020	Citrate cycle (TCA cycle)	8/407	30/8584	5.55175e-05	0.000138568	4.32357e-05	OGDH/ACO1/DLD/DLST/SDHA/SDHB/SDHD/SUCLA2	8
hsa04270	Vascular smooth muscle contraction	18/407	134/8584	5.76426e-05	0.000142712	4.45287e-05	MAP2K1/CACNA1D/EDN1/NPPA/ADCY5/CACNA1C/CALCA/CACNA1F/PRKCA/AGTR1/ADORA2A/PRKCD/AVP/AGT/GNAS/RHOA/PRKACA/PLA2G2A	18
hsa05206	MicroRNAs in cancer	31/407	310/8584	6.26101e-05	0.00015377	4.79791e-05	PTGS2/MAP2K1/PDGFB/MMP9/BCL2/NFKB1/DNMT3A/TPM1/IKBKB/TP53/PRKCA/EGFR/NOTCH2/TGFB2/CDKN2A/NOTCH1/ABCB1/ABL1/DNMT1/IRS2/RHOA/VIM/BRCA1/MYC/SIRT1/CDKN1A/DNMT3B/PDGFRA/PDGFRB/ZEB2/HMOX1	31
hsa04976	Bile secretion	14/407	89/8584	6.81424e-05	0.000166029	5.18041e-05	ATP1A1/HMGCR/NR1H4/CYP3A4/ADCY5/ATP1A3/AQP1/CFTR/ATP1A2/ABCB1/ABCC2/GNAS/SLC2A1/PRKACA	14
hsa04664	Fc epsilon RI signaling pathway	12/407	68/8584	7.14157e-05	0.000172635	5.38652e-05	MAP2K1/TNF/ALOX5/CSF2/IL4/AKT1/PRKCA/RAC1/RAC2/MAPK14/AKT2/AKT3	12
hsa05213	Endometrial cancer	11/407	58/8584	7.2047e-05	0.0001728	5.39168e-05	MAP2K1/BAX/TP53/AKT1/EGFR/CASP9/CTNNB1/AKT2/AKT3/MYC/CDKN1A	11
hsa05211	Renal cell carcinoma	12/407	69/8584	8.28158e-05	0.000197089	6.14952e-05	MAP2K1/PDGFB/TGFB1/HIF1A/AKT1/RAC1/TGFB2/AKT2/AKT3/SLC2A1/CDKN1A/CDC42	12
hsa05032	Morphine addiction	14/407	91/8584	8.74595e-05	0.000206539	6.44438e-05	ADORA1/ADCY5/DRD1/PDE8B/CACNA1A/PRKCA/PDE4A/OPRM1/KCNJ5/GNAS/GRK5/GRK6/PDE10A/PRKACA	14
hsa04371	Apelin signaling pathway	18/407	139/8584	9.3715e-05	0.000219622	6.8526e-05	MAP2K1/ADCY5/APLN/NOS1/NOS2/AKT1/AGTR1/PRKAG2/JAG1/PIK3CG/SMAD3/AKT2/AKT3/SMAD4/SERPINE1/RYR2/PRKACA/NOS3	18
hsa04613	Neutrophil extracellular trap formation	22/407	191/8584	9.74452e-05	0.000226634	7.07138e-05	MAP2K1/SRC/NFKB1/MPO/HDAC9/ITGAL/ITGB2/AKT1/C3/PRKCA/CYBA/CYBB/ELANE/NCF2/RAC1/RAC2/TLR4/PPIF/MAPK14/SLC25A4/AKT2/AKT3	22
hsa05223	Non-small cell lung cancer	12/407	72/8584	0.000126893	0.000292903	9.13909e-05	MAP2K1/BAX/TP53/AKT1/PRKCA/EGFR/CDKN2A/CASP9/AKT2/AKT3/RET/CDKN1A	12
hsa04218	Cellular senescence	19/407	156/8584	0.00013858	0.000317493	9.90634e-05	MAP2K1/TGFB1/CACNA1D/NFKB1/IL6/TP53/AKT1/TGFB2/CDKN2A/MAPK14/SLC25A4/SMAD3/TGFBR2/AKT2/AKT3/MYC/SIRT1/SERPINE1/CDKN1A	19
hsa05414	Dilated cardiomyopathy	14/407	96/8584	0.000157828	0.000358912	0.000111987	TGFB1/TNF/CACNA1D/IGF1/ADCY5/CACNA1C/TPM1/CACNA1F/TGFB2/AGT/ATP2A1/GNAS/RYR2/PRKACA	14
hsa00785	Lipoic acid metabolism	6/407	19/8584	0.000175321	0.000395761	0.000123484	OGDH/DLD/BCKDHA/BCKDHB/DBT/DLST	6
hsa04071	Sphingolipid signaling pathway	16/407	121/8584	0.000178129	0.000399165	0.000124547	MAP2K1/TNF/BCL2/ADORA1/BAX/NFKB1/TP53/AKT1/PRKCA/RAC1/RAC2/MAPK14/AKT2/AKT3/RHOA/NOS3	16
hsa04810	Regulation of actin cytoskeleton	24/407	229/8584	0.000209218	0.000464408	0.000144903	MAP2K1/FGFR2/PDGFB/SRC/CXCR4/FGFR1/INS/ITGAL/ITGB2/FGF10/AKT1/F2/EGFR/RAC1/RAC2/MSN/FGF2/AKT2/AKT3/FGF1/RHOA/CDC42/PDGFRA/PDGFRB	24
hsa04260	Cardiac muscle contraction	13/407	87/8584	0.000210269	0.000464408	0.000144903	ATP1A1/COX2/COX5A/COX6B1/CACNA1D/ATP1A3/CACNA1C/TPM1/CACNA1F/ATP1A2/ATP2A1/RYR2/CASQ2	13
hsa04960	Aldosterone-regulated sodium reabsorption	8/407	37/8584	0.000273483	0.000599708	0.00018712	ATP1A1/NR3C2/IGF1/ATP1A3/INS/PRKCA/ATP1A2/INSR	8
hsa05221	Acute myeloid leukemia	11/407	67/8584	0.000276917	0.000602932	0.000188126	MAP2K1/NFKB1/CHUK/CSF2/IKBKB/MPO/AKT1/AKT2/AKT3/MYC/CSF1R	11
hsa04630	JAK-STAT signaling pathway	19/407	166/8584	0.000313147	0.000677016	0.000211241	PDGFB/IFNG/BCL2/LEP/CSF2/IL2/IL4/IL6/AKT1/EGFR/AKT2/AKT3/GFAP/MYC/CDKN1A/EPO/IL10/PDGFRA/PDGFRB	19
hsa05330	Allograft rejection	8/407	38/8584	0.000332291	0.000713379	0.000222587	IFNG/TNF/FAS/CD40/IL2/IL4/FASLG/IL10	8
hsa05120	Epithelial cell signaling in Helicobacter pylori infection	11/407	70/8584	0.000410345	0.000860524	0.000268499	SRC/NFKB1/ADAM17/CHUK/IKBKB/EGFR/RAC1/MAPK14/NFKBIA/CCL5/CDC42	11
hsa04550	Signaling pathways regulating pluripotency of stem cells	17/407	143/8584	0.000411729	0.000860524	0.000268499	MAP2K1/FGFR2/WNT5A/IGF1/FGFR1/AKT1/KLF4/REST/FGF2/MAPK14/CTNNB1/SMAD3/AKT2/AKT3/SMAD4/MYC/NODAL	17
hsa04520	Adherens junction	13/407	93/8584	0.000412043	0.000860524	0.000268499	SRC/FGFR1/EGFR/RAC1/RAC2/CTNNB1/SMAD3/TGFBR2/RHOA/SMAD4/CSNK2A1/INSR/CDC42	13
hsa04912	GnRH signaling pathway	13/407	93/8584	0.000412043	0.000860524	0.000268499	MAP2K1/SRC/CACNA1D/ADCY5/CACNA1C/CACNA1F/PRKCA/EGFR/PRKCD/MAPK14/GNAS/CDC42/PRKACA	13
hsa04730	Long-term depression	10/407	60/8584	0.000460771	0.000955789	0.000298223	MAP2K1/IGF1/CRH/CRHR1/NOS1/CACNA1A/PRKCA/GRIA1/GRIA2/GNAS	10
hsa05033	Nicotine addiction	8/407	40/8584	0.000480856	0.000990757	0.000309134	GRIN2A/CHRNA7/GRIN1/CACNA1A/GRIN2B/CHRNA4/GRIA1/GRIA2	8
hsa00330	Arginine and proline metabolism	9/407	50/8584	0.000491179	0.00100528	0.000313665	ALDH2/GAMT/MAOB/NOS1/NOS2/MAOA/DAO/ALDH7A1/NOS3	9
hsa04922	Glucagon signaling pathway	14/407	107/8584	0.000498919	0.00101204	0.000315776	FBP1/AKT1/GCG/PPARA/PRKAG2/CREB1/PYGL/AKT2/AKT3/GNAS/PYGM/SLC2A1/SIRT1/PRKACA	14
hsa04621	NOD-like receptor signaling pathway	20/407	186/8584	0.000501077	0.00101204	0.000315776	TNF/BCL2/IL1B/NFKB1/CHUK/IKBKB/IL6/MYD88/RIPK1/CYBA/CYBB/TLR4/PRKCD/MAPK14/NFKBIA/CCL2/CCL5/RHOA/YWHAE/HSP90AA1	20
hsa04662	B cell receptor signaling pathway	12/407	84/8584	0.000558152	0.00111995	0.000349445	MAP2K1/NFKB1/FOS/LILRB1/CHUK/IKBKB/AKT1/RAC1/RAC2/NFKBIA/AKT2/AKT3	12
hsa05034	Alcoholism	20/407	188/8584	0.000575349	0.00114696	0.000357873	MAP2K1/GRIN2A/ADCY5/CRH/DRD1/DRD2/GRIN1/MAOB/PPP1R1B/HDAC9/GRIN2B/ADORA2A/SLC18A2/MAOA/SLC6A3/CREB1/GNAS/DDC/TH/PRKACA	20
hsa05171	Coronavirus disease - COVID-19	23/407	232/8584	0.000625909	0.0012397	0.00038681	TNF/IL1B/NFKB1/ADAM17/FOS/CHUK/CSF2/IKBKB/IL2/IL6/MYD88/C3/PRKCA/F2/AGTR1/EGFR/CYBB/TLR4/MAPK14/NFKBIA/CCL2/IRAK1/ACE	23
hsa04115	p53 signaling pathway	11/407	74/8584	0.000668608	0.00131579	0.000410549	BCL2/FAS/IGF1/BAX/TP53/CDKN2A/APAF1/CASP9/RRM2B/SERPINE1/CDKN1A	11
hsa04750	Inflammatory mediator regulation of TRP channels	13/407	98/8584	0.000688209	0.00134573	0.000419893	SRC/TRPV1/IGF1/IL1B/ADCY5/HTR2A/HTR2C/PRKCA/PRKCD/MAPK14/GNAS/PRKACA/NTRK1	13
hsa01210	2-Oxocarboxylic acid metabolism	7/407	33/8584	0.000747758	0.00145292	0.000453338	OGDH/ACO1/DLD/BCKDHA/BCKDHB/DBT/DLST	7
hsa04961	Endocrine and other factor-regulated calcium reabsorption	9/407	53/8584	0.000766108	0.00147921	0.000461541	ATP1A1/ESR1/VDR/CALB1/ATP1A3/PRKCA/ATP1A2/GNAS/PRKACA	9
hsa04940	Type I diabetes mellitus	8/407	43/8584	0.000800503	0.00153596	0.000479248	IFNG/TNF/FAS/IL1B/INS/IL2/FASLG/HSPD1	8
hsa04060	Cytokine-cytokine receptor interaction	27/407	297/8584	0.000846493	0.00161412	0.000503634	TGFB1/CXCR4/IFNG/TNF/FAS/IL1B/LEP/CD40/CSF2/IL17A/IL2/IL4/IL6/NGFR/BMP2/TGFB2/GDF5/CX3CR1/TGFBR2/CCL2/CCL5/FASLG/EPO/IL10/NODAL/CSF1/CSF1R	27
hsa04972	Pancreatic secretion	13/407	102/8584	0.00100894	0.001912	0.00059658	ATP1A1/KCNQ1/ADCY5/ATP1A3/CFTR/PRKCA/RAC1/ATP1A2/ATP2A1/GNAS/RHOA/RYR2/PLA2G2A	13
hsa01200	Carbon metabolism	14/407	115/8584	0.00103457	0.00193667	0.000604276	CAT/FBP1/ALDOA/OGDH/TPI1/ACO1/DLD/HK1/PRPS1/DLST/SDHA/SDHB/SDHD/SUCLA2	14
hsa04724	Glutamatergic synapse	14/407	115/8584	0.00103457	0.00193667	0.000604276	CACNA1D/DLG4/GRIN2A/ADCY5/CACNA1C/GRIN1/CACNA1A/PRKCA/GRIN2B/GRIA1/GRIA2/GNAS/SLC1A3/PRKACA	14
hsa04658	Th1 and Th2 cell differentiation	12/407	92/8584	0.00127358	0.00236964	0.000739369	IFNG/NFKB1/FOS/CHUK/IKBKB/IL2/IL4/NOTCH2/MAPK14/NFKBIA/NOTCH1/JAG1	12
hsa05016	Huntington disease	27/407	306/8584	0.00132421	0.00244899	0.000764127	TUBA4A/COX2/COX5A/COX6B1/DLG4/STX1A/BAX/GRIN1/PPARG/TP53/GRIN2B/GPX1/KCNJ10/PPIF/REST/GRIA1/GRIA2/APAF1/CASP9/CREB1/SLC25A4/HTT/SDHA/SDHB/SDHD/SLC1A3/SP1	27
hsa04510	Focal adhesion	20/407	203/8584	0.00150365	0.0027642	0.00086248	MAP2K1/PDGFB/SRC/BCL2/IGF1/AKT1/CAV3/PRKCA/EGFR/RAC1/RAC2/CAV1/CTNNB1/AKT2/AKT3/RHOA/COL1A1/CDC42/PDGFRA/PDGFRB	20
hsa00280	Valine, leucine and isoleucine degradation	8/407	48/8584	0.00169348	0.00309463	0.000965579	ALDH2/ACADM/DLD/MCCC1/ALDH7A1/BCKDHA/BCKDHB/DBT	8
hsa04350	TGF-beta signaling pathway	13/407	108/8584	0.00171796	0.00312079	0.000973743	TGFB1/IFNG/TNF/BMP2/TGFB2/GDF5/SMAD3/TGFBR2/RHOA/SMAD4/MYC/NODAL/SP1	13
hsa05416	Viral myocarditis	9/407	60/8584	0.00190702	0.00344386	0.00107455	CD40/ITGAL/ITGB2/RAC1/RAC2/ICAM1/CAV1/ABL1/CASP9	9
hsa05202	Transcriptional misregulation in cancer	19/407	193/8584	0.00197468	0.00354519	0.00110616	MMP9/IGF1/BAX/NFKB1/CD40/CSF2/IL6/MPO/PPARG/TP53/NGFR/ELANE/TGFBR2/DDIT3/MYC/CDKN1A/SP1/CSF1R/NTRK1	19
hsa04910	Insulin signaling pathway	15/407	137/8584	0.00205564	0.00366908	0.00114482	MAP2K1/FBP1/INS/IKBKB/AKT1/PRKAG2/PYGL/AKT2/AKT3/HK1/IRS2/PYGM/SREBF1/INSR/PRKACA	15
hsa04012	ErbB signaling pathway	11/407	85/8584	0.00214008	0.00378865	0.00118213	MAP2K1/SRC/AKT1/PRKCA/EGFR/ABL1/AKT2/AKT3/NRG1/MYC/CDKN1A	11
hsa04611	Platelet activation	14/407	124/8584	0.00214731	0.00378865	0.00118213	PTGS1/SRC/ADCY5/AKT1/F2/MAPK14/PIK3CG/AKT2/AKT3/GNAS/RHOA/COL1A1/PRKACA/NOS3	14
hsa04640	Hematopoietic cell lineage	12/407	99/8584	0.00240809	0.00422448	0.00131811	CD34/TNF/IL1B/CSF2/FCER2/IL4/IL6/CD36/MME/EPO/CSF1/CSF1R	12
hsa00260	Glycine, serine and threonine metabolism	7/407	40/8584	0.00245155	0.00427627	0.00133427	GAMT/MAOB/MAOA/CBS/DAO/DLD/ALDH7A1	7
hsa04971	Gastric acid secretion	10/407	76/8584	0.0029721	0.005155	0.00160845	ATP1A1/KCNQ1/ADCY5/ATP1A3/CFTR/PRKCA/KCNJ10/ATP1A2/GNAS/PRKACA	10
hsa05332	Graft-versus-host disease	7/407	42/8584	0.0032701	0.00564001	0.00175978	IFNG/TNF/FAS/IL1B/IL2/IL6/FASLG	7
hsa05165	Human papillomavirus infection	27/407	331/8584	0.00403698	0.00692376	0.00216034	PTGS2/MAP2K1/WNT5A/TNF/FAS/BAX/NFKB1/CHUK/IKBKB/TP53/AKT1/EGFR/NOTCH2/NOTCH1/CREB1/CTNNB1/JAG1/AKT2/AKT3/FASLG/GNAS/COL1A1/CDKN1A/CDC42/PRKACA/PDGFRB/TERT	27
hsa00010	Glycolysis / Gluconeogenesis	9/407	67/8584	0.00412048	0.00698889	0.00218066	ADH1C/ADH7/ALDH2/FBP1/ALDOA/TPI1/DLD/HK1/ALDH7A1	9
hsa04720	Long-term potentiation	9/407	67/8584	0.00412048	0.00698889	0.00218066	MAP2K1/GRIN2A/CACNA1C/GRIN1/PRKCA/GRIN2B/GRIA1/GRIA2/PRKACA	9
hsa00830	Retinol metabolism	9/407	68/8584	0.00455568	0.00768457	0.00239772	ADH1C/ALDH1A1/ADH7/LRAT/RDH12/RDH5/CYP3A4/CYP1A1/CYP1A2	9
hsa04977	Vitamin digestion and absorption	5/407	24/8584	0.00470384	0.00789114	0.00246218	LRAT/MMACHC/APOA1/SLC19A1/SLC19A3	5
hsa02010	ABC transporters	7/407	45/8584	0.00486931	0.00812434	0.00253494	CFTR/ABCA1/ABCC8/ABCA7/ABCB1/ABCC2/ABCC9	7
hsa00500	Starch and sucrose metabolism	6/407	36/8584	0.00635999	0.0105541	0.00329308	GAA/MGAM/PYGL/HK1/PYGM/SI	6
hsa04390	Hippo signaling pathway	15/407	157/8584	0.00746158	0.0123156	0.00384269	TGFB1/WNT5A/DLG4/ITGB2/BMP2/TGFB2/GDF5/CTNNB1/SMAD3/TGFBR2/FGF1/SMAD4/YWHAE/MYC/SERPINE1	15
hsa00230	Purine metabolism	13/407	128/8584	0.00752484	0.0123536	0.00385455	ADA/ADCY5/PDE8B/PDE4A/PDE5A/APRT/RRM2B/HPRT1/PRPS1/XDH/PDE10A/IMPDH1/DGUOK	13
hsa04672	Intestinal immune network for IgA production	7/407	49/8584	0.00783832	0.0127998	0.00399377	TGFB1/CXCR4/CD40/IL2/IL4/IL6/IL10	7
hsa04217	Necroptosis	15/407	159/8584	0.00835557	0.0135723	0.00423479	IFNG/TNF/BCL2/FAS/IL1B/BAX/RIPK1/CYBB/TLR4/PYGL/SLC25A4/AIFM1/FASLG/PYGM/HSP90AA1	15
hsa03320	PPAR signaling pathway	9/407	75/8584	0.00868539	0.0139603	0.00435586	CYP27A1/PPARG/CD36/ADIPOQ/NR1H3/PPARA/ACADM/APOA1/APOC3	9
hsa04623	Cytosolic DNA-sensing pathway	9/407	75/8584	0.00868539	0.0139603	0.00435586	IL1B/NFKB1/CHUK/IKBKB/IL6/RIPK1/NFKBIA/CCL5/SAMHD1	9
hsa05217	Basal cell carcinoma	8/407	63/8584	0.00937669	0.0149929	0.00467807	SHH/WNT5A/BAX/TP53/BMP2/GLI3/CTNNB1/CDKN1A	8
hsa05320	Autoimmune thyroid disease	7/407	53/8584	0.0119678	0.0190369	0.00593984	FAS/TPO/CD40/IL2/IL4/FASLG/IL10	7
hsa04714	Thermogenesis	19/407	232/8584	0.014081	0.0222829	0.00695266	COX2/COX5A/COX6B1/NPPA/ADCY5/CNR1/FGFR1/PPARG/GCG/MAPK14/PNPLA2/PRDM16/PRKAG2/CREB1/GNAS/SDHA/SDHB/SDHD/PRKACA	19
hsa00071	Fatty acid degradation	6/407	43/8584	0.0150801	0.0237415	0.00740777	ADH1C/ADH7/ALDH2/ACADM/GCDH/ALDH7A1	6
hsa00640	Propanoate metabolism	5/407	32/8584	0.0163445	0.0254709	0.00794736	DLD/BCKDHA/BCKDHB/DBT/SUCLA2	5
hsa04215	Apoptosis - multiple species	5/407	32/8584	0.0163445	0.0254709	0.00794736	BCL2/BAX/NGFR/APAF1/CASP9	5
hsa04962	Vasopressin-regulated water reabsorption	6/407	44/8584	0.016785	0.0260253	0.00812034	AVPR2/AVP/CREB1/GNAS/DYNC1H1/PRKACA	6
hsa00220	Arginine biosynthesis	4/407	22/8584	0.0184707	0.0283525	0.0088465	NOS1/NOS2/OTC/NOS3	4
hsa00340	Histidine metabolism	4/407	22/8584	0.0184707	0.0283525	0.0088465	ALDH2/MAOB/MAOA/ALDH7A1	4
hsa04061	Viral protein interaction with cytokine and cytokine receptor	10/407	100/8584	0.0197971	0.0302373	0.00943458	CXCR4/TNF/IL2/IL6/CX3CR1/CCL2/CCL5/IL10/CSF1/CSF1R	10
hsa04916	Melanogenesis	10/407	101/8584	0.0210806	0.0320383	0.00999653	MAP2K1/WNT5A/EDN1/ADCY5/TYR/PRKCA/CREB1/CTNNB1/GNAS/PRKACA	10
hsa04614	Renin-angiotensin system	4/407	23/8584	0.0215441	0.0324218	0.0101162	AGTR1/AGT/MME/ACE	4
hsa04964	Proximal tubule bicarbonate reclamation	4/407	23/8584	0.0215441	0.0324218	0.0101162	ATP1A1/ATP1A3/AQP1/ATP1A2	4
hsa04914	Progesterone-mediated oocyte maturation	10/407	102/8584	0.0224237	0.0335809	0.0104778	MAP2K1/IGF1/ADCY5/INS/AKT1/MAPK14/AKT2/AKT3/HSP90AA1/PRKACA	10
hsa04650	Natural killer cell mediated cytotoxicity	12/407	132/8584	0.0225337	0.0335817	0.0104781	MAP2K1/IFNG/TNF/FAS/CSF2/ITGAL/ITGB2/PRKCA/RAC1/RAC2/ICAM1/FASLG	12
hsa04723	Retrograde endocannabinoid signaling	13/407	148/8584	0.0232488	0.0344801	0.0107584	PTGS2/CACNA1D/ADCY5/CACNA1C/CNR1/CACNA1A/CACNA1F/PRKCA/GRIA1/GRIA2/KCNJ5/MAPK14/PRKACA	13
hsa00590	Arachidonic acid metabolism	7/407	61/8584	0.0245661	0.0362587	0.0113134	PTGS1/PTGS2/CYP2E1/ALOX5/GGT1/HPGDS/PLA2G2A	7
hsa00140	Steroid hormone biosynthesis	7/407	62/8584	0.0266073	0.0390835	0.0121948	CYP19A1/CYP17A1/CYP2E1/CYP3A4/COMT/CYP1A1/CYP1A2	7
hsa00310	Lysine degradation	7/407	63/8584	0.0287612	0.0420461	0.0131191	ALDH2/PRDM16/DLD/GCDH/ALDH7A1/DLST/PLOD1	7
hsa04721	Synaptic vesicle cycle	8/407	78/8584	0.0308336	0.0448622	0.0139978	STX1A/SLC6A2/CACNA1A/SLC18A2/SLC6A4/SLC6A3/STX3/SLC1A3	8
hsa04970	Salivary secretion	9/407	93/8584	0.0317207	0.0459351	0.0143326	ATP1A1/ADCY5/ADRB2/ATP1A3/NOS1/PRKCA/ATP1A2/GNAS/PRKACA	9
hsa04150	mTOR signaling pathway	13/407	156/8584	0.0338647	0.0488097	0.0152295	MAP2K1/WNT5A/TNF/IGF1/INS/CHUK/IKBKB/AKT1/PRKCA/AKT2/AKT3/RHOA/INSR	13
